# Supplementary figures and images for: The protective effect of propofol on ionizing radiation-induced hematopoietic system damage in mice
Source: Royal Society of Chemistry journal article supplement (doi:10.1039/c9ra07262d), 2019-01-01

ARTICLE

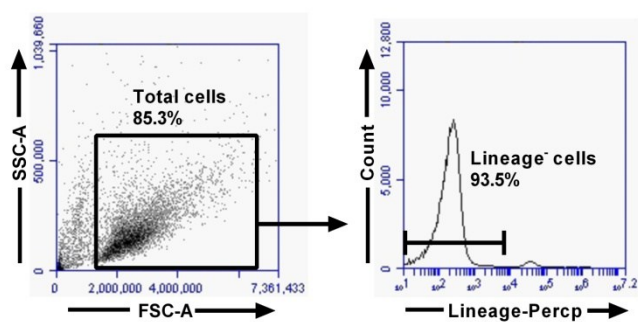

**Supplementary Figure** Representative Flow scatters of Lineage<sup>-</sup> cells' purity.

Supplement: c9ra07262d1.pdf [file c9ra07262d1.pdf]
